# Supplementary material
Source: publisher figshare collection journal article supplement (https://frontiersin.figshare.com/ndownloader/files/14251097)
Supplement: Supplementary file [file 14251097]

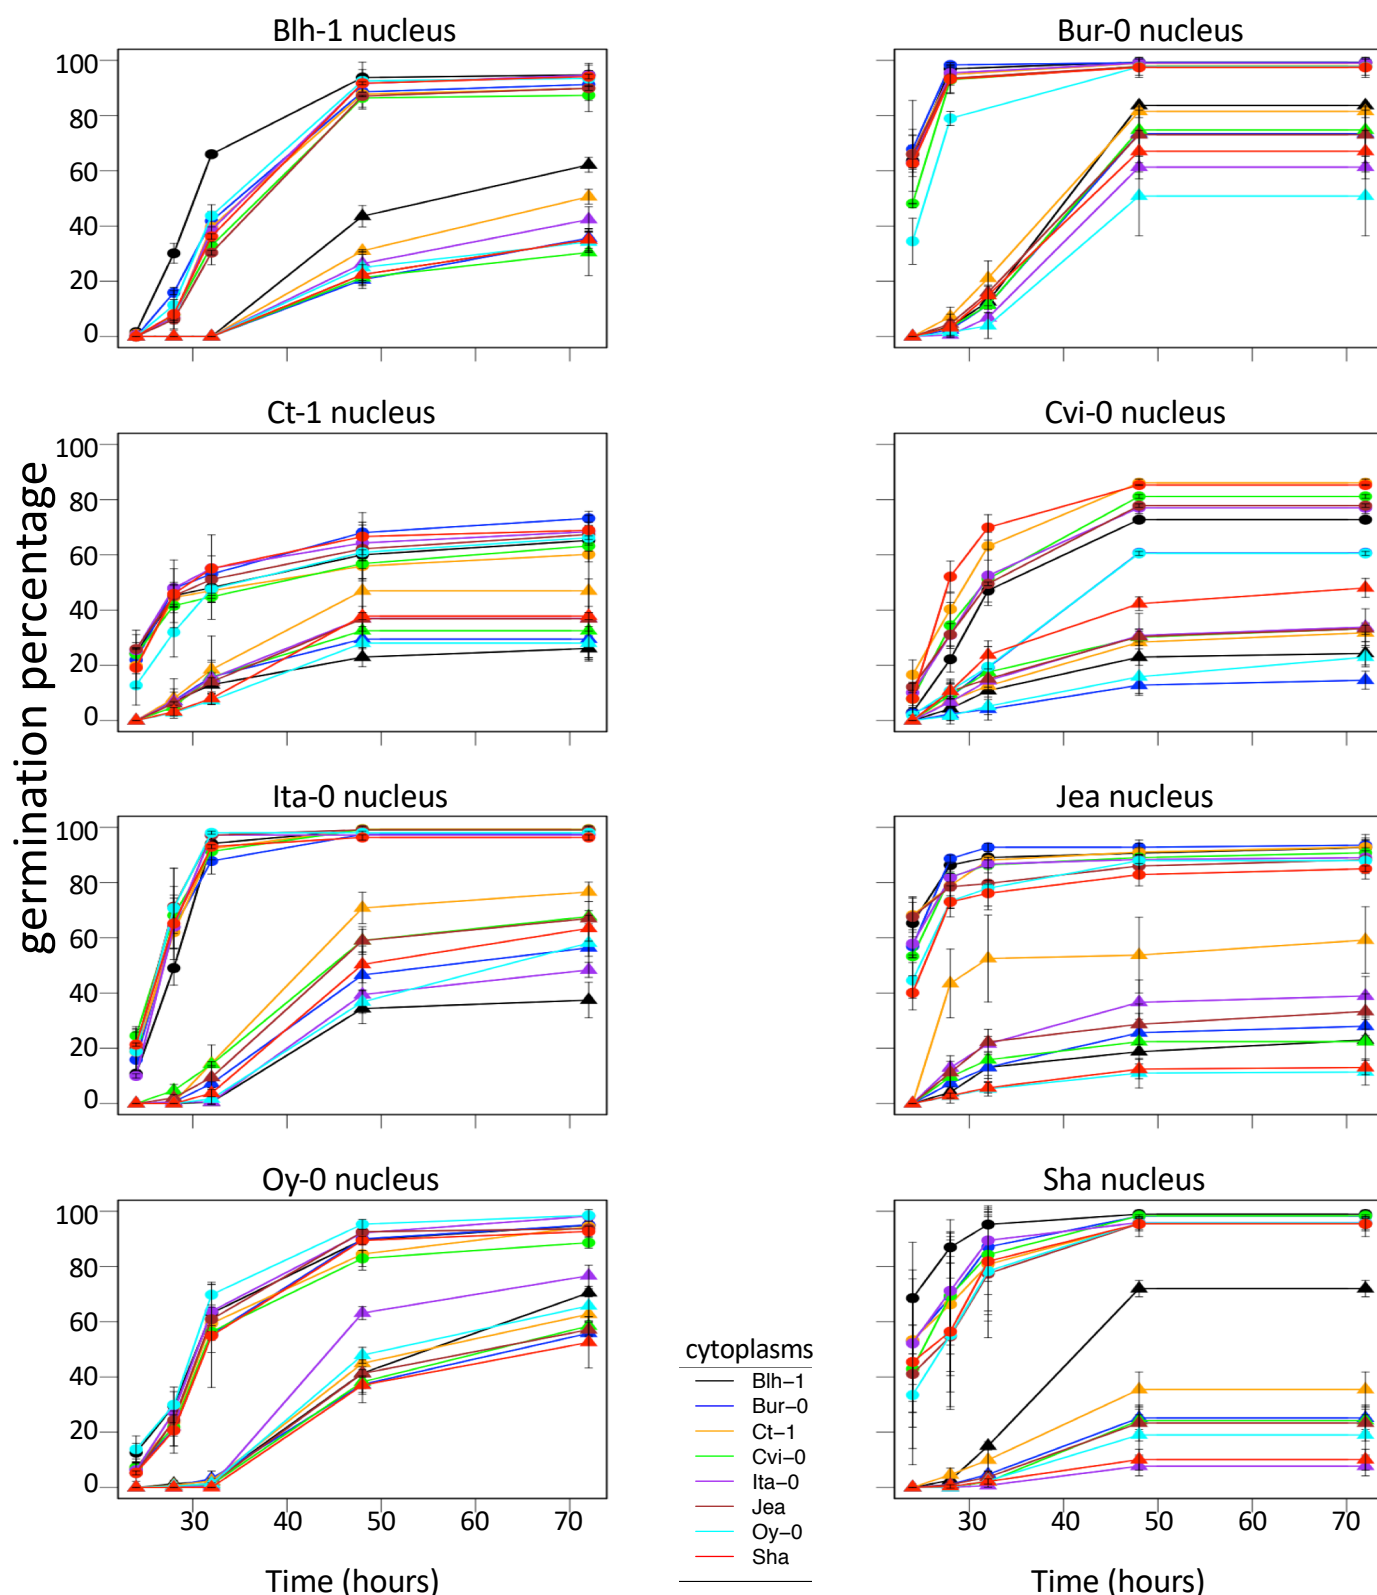

Fig. S3 Germination time curves of cytoline series on water and NaCl.

Each panel represents the germination kinetics of cytolines sharing the same nucleus, either on water (dots) or on salt (triangles). The colors of the graphs indicate the cytoplasms of the genotypes: black, Blh-1; blue, Bur-0, orange, Ct-1; green, Cvi-0; purple, Ita-0; brown, Jea; cyan, Oy-0; red, Sha. Error bars indicate the SD around the plotted mean for germination, from two replicates on water, and three replicates on salt. The NaCl concentration used was chosen after preliminary experiments on the corresponding natural accession (Table S1).
